# Supplementary material
Source: PubMed Central journal article supplement (PMC3225650)
Supplement: NIHMS332385-supplement-Supp_Figure_S1-S2_Table_S1-S2.pdf [file NIHMS332385-supplement-Supp_Figure_S1-S2_Table_S1-S2.pdf]

Suppl. Figure 1

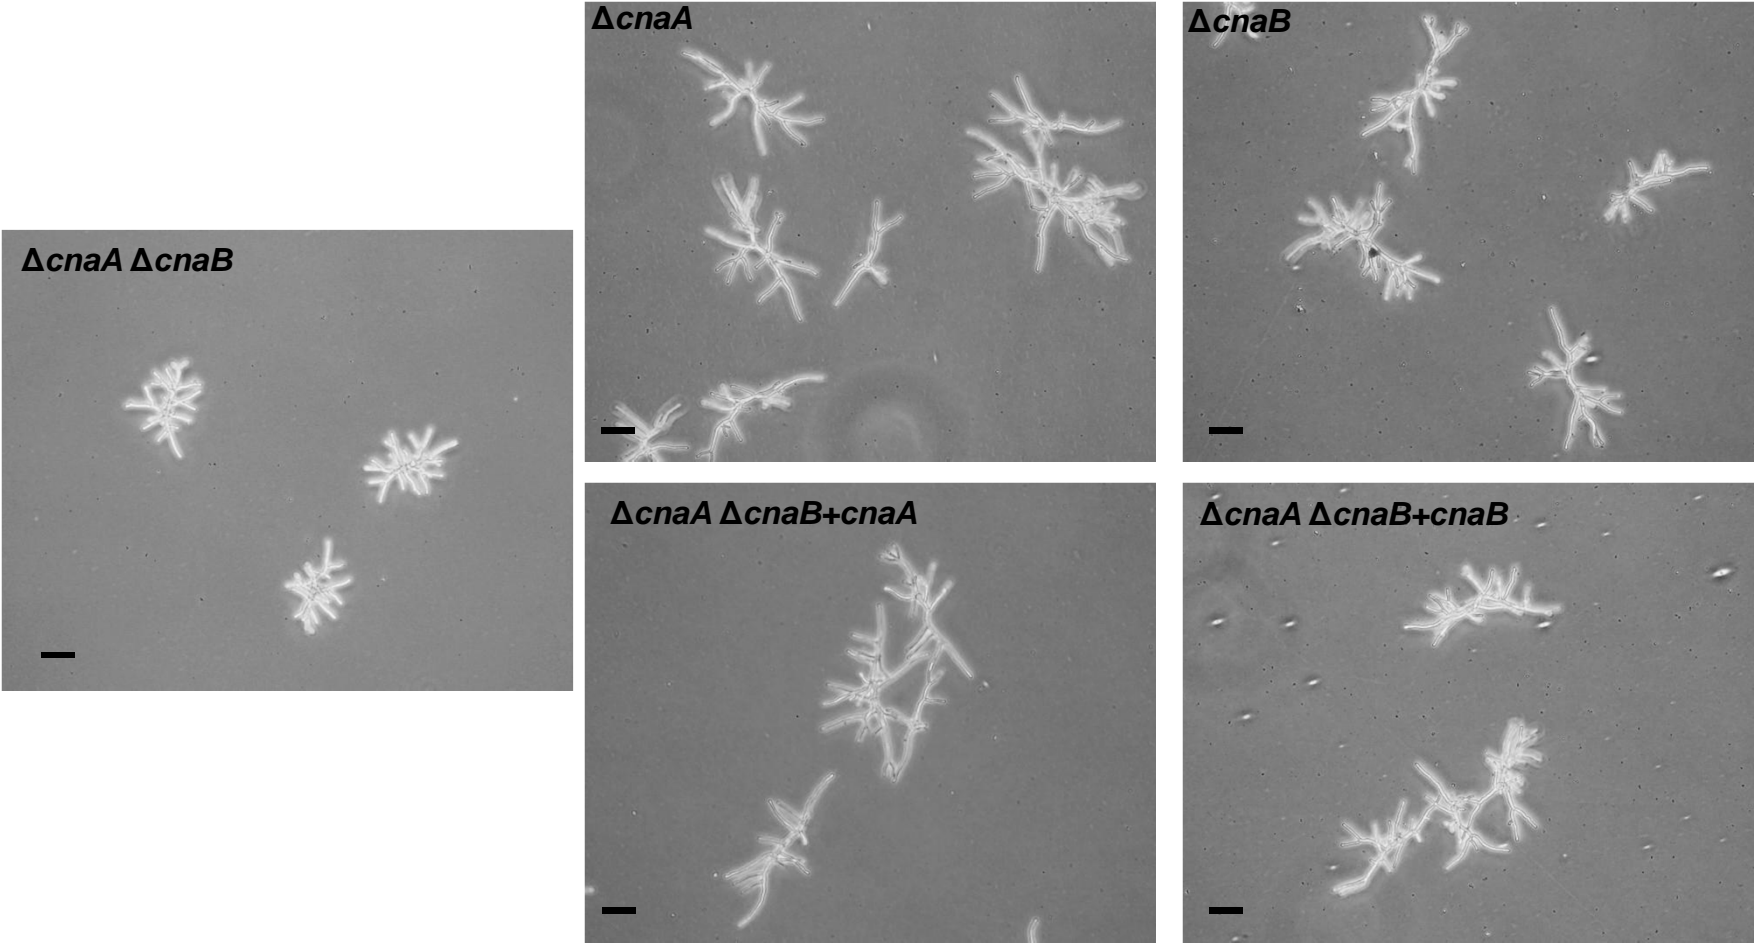

Hyphal growth recovery in the  $\Delta cnaA \Delta cnaB$  strain transformed with either *cnaA* or *cnaB* alone was observed by inoculating a total of  $1 \times 10^4$  conidia GMM liquid medium and incubating at 37 C for 24 h. Note that the double mutant strains containing either *cnaA* or *cnaB* grow better and resemble the single mutants ( $\Delta cnaA$  and  $\Delta cnaB$  ). Scale Bar 40  $\mu$ m.

Suppl. Figure 2

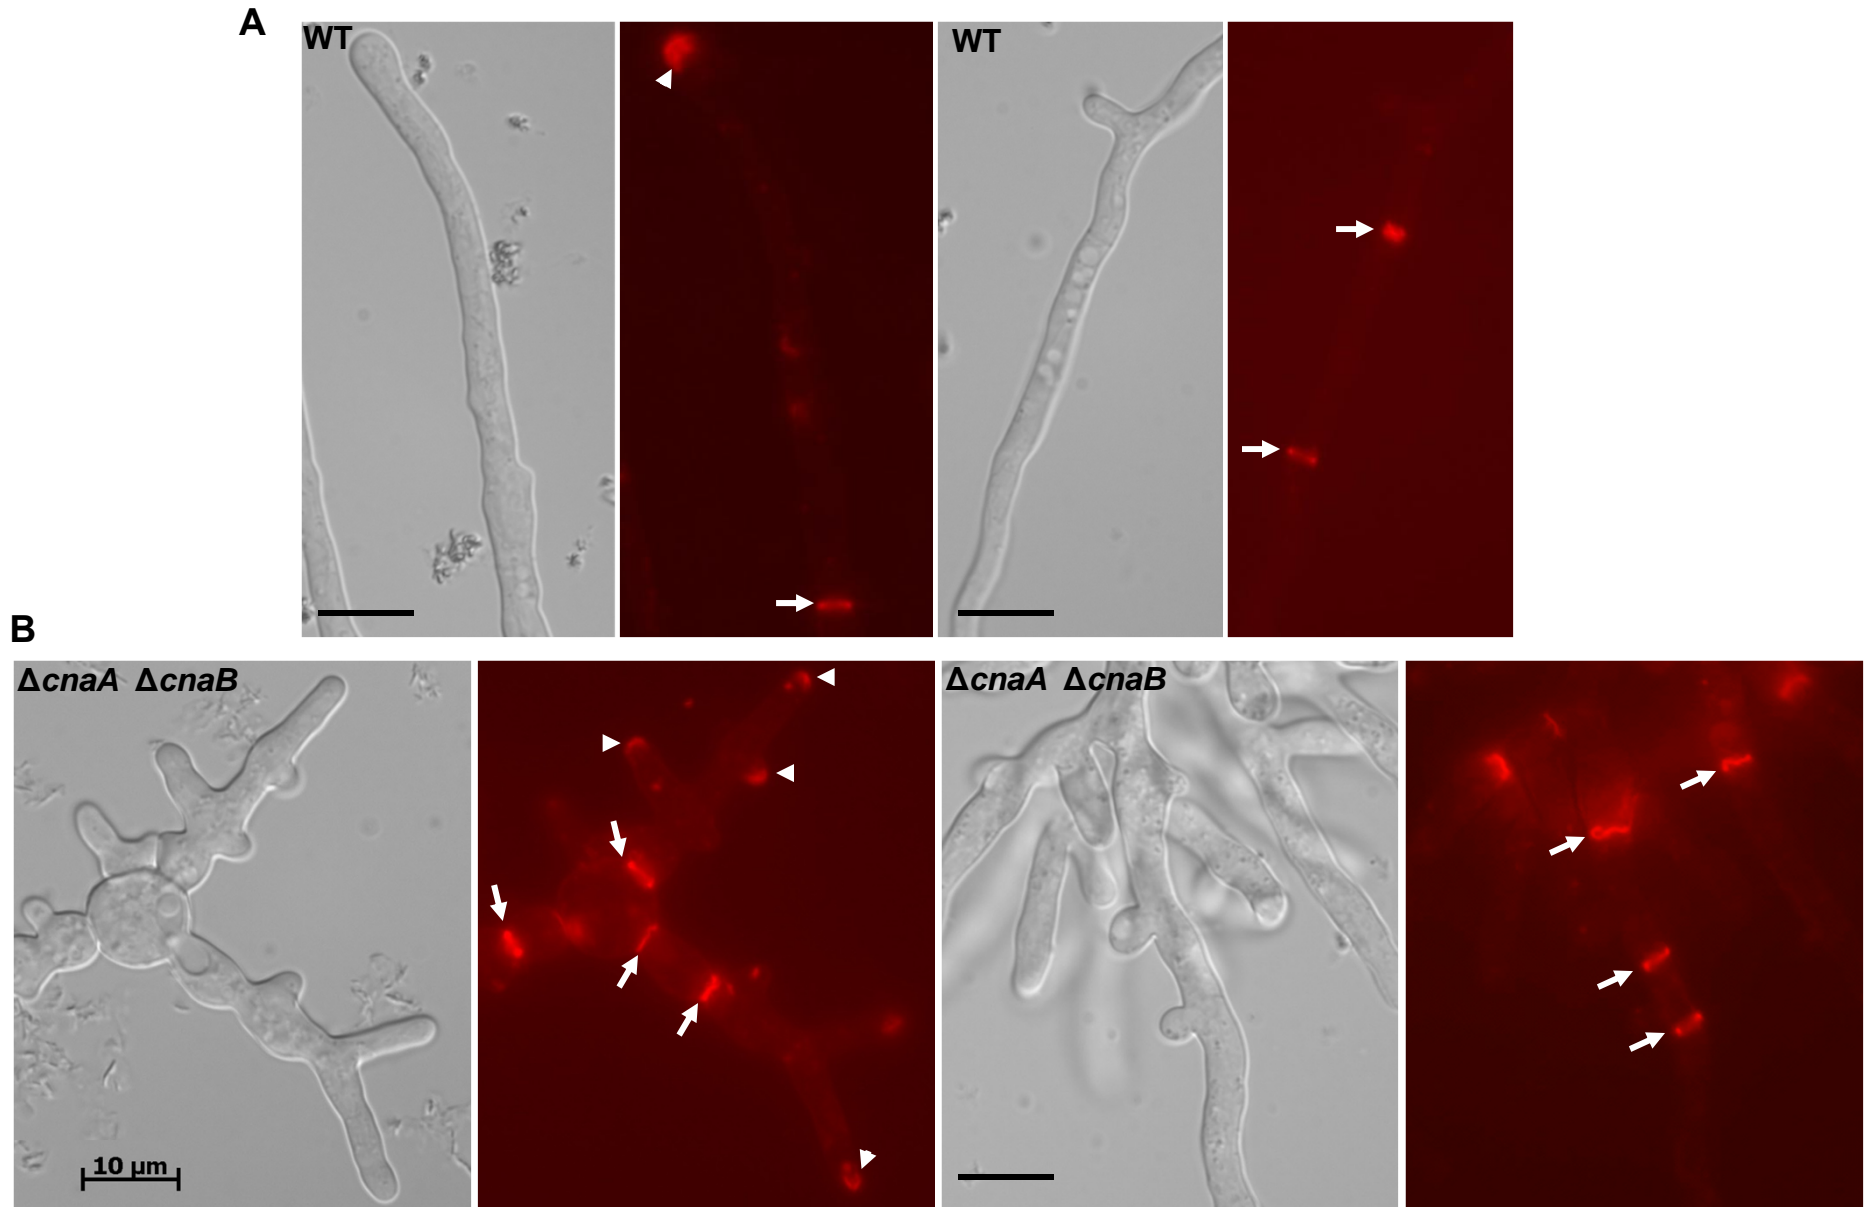

The wild-type and the  $\Delta cnaA \Delta cnaB$  strains expressing Lifeact-RFP were visualized by fluorescence microscopy. Actin localization was observed at the tips in both the strains (indicated by arrow heads). Moreover, contractile actin rings were normally formed in the  $\Delta cnaA \Delta cnaB$  strain (indicated by arrows) when compared to the wild-type strain. Scale bar, 10  $\mu\text{m}$ .

**Supplementary Table S1: Strains used in the present study**

| <b>Strain</b>                             | <b>Parent strain</b> | <b>Genotype</b>                                                                                                                   |
|-------------------------------------------|----------------------|-----------------------------------------------------------------------------------------------------------------------------------|
| Af293                                     |                      | Wild type                                                                                                                         |
| Af293.1                                   | Af293                | <i>pyrG1</i>                                                                                                                      |
| Af293.6                                   | Af293                | <i>argB1, pyrG1</i>                                                                                                               |
| $\Delta$ <i>cnaA</i>                      | Af293.1              | $\Delta$ <i>cnaA::pyrG1</i>                                                                                                       |
| $\Delta$ <i>cnaB</i>                      | Af293.1              | $\Delta$ <i>cnaB::pyrG1</i>                                                                                                       |
| $\Delta$ <i>cnaA</i> $\Delta$ <i>cnaB</i> | Af293.6              | $\Delta$ <i>cnaA::argB1</i> $\Delta$ <i>cnaB::pyrG1</i>                                                                           |
| OCNAG3                                    | Af293.1              | $\Delta$ <i>cnaA::pyrG1 otef-cnaA-gfp-hph</i>                                                                                     |
| OCNBG2                                    | Af293.1              | $\Delta$ <i>cnaB::pyrG1 otef-cnaB-gfp-hph</i>                                                                                     |
| AKO-CNBG1                                 | Af293.1              | $\Delta$ <i>cnaA::pyrG1 otef-cnaB-gfp-hph</i>                                                                                     |
| BKO-CNAG2                                 | Af293.1              | $\Delta$ <i>cnaB::pyrG1 otef-cnaA-gfp-hph</i>                                                                                     |
| OCNACB1                                   | Af293.6              | $\Delta$ <i>cnaA::argB1</i> $\Delta$ <i>cnaB::pyrG1 otef-cnaA-gfp-hph otef-mcherry-cnaB-phleo</i>                                 |
| ABKO-NPCNACNB1                            | Af293.6              | $\Delta$ <i>cnaA::argB1</i> $\Delta$ <i>cnaB::pyrG1 cnaA</i> <i>promo-cnaA-gfp-hph cnaB</i> <i>promo-mcherry-cnaB-phleo</i>       |
| ABKO-NPCNA-1                              | Af293.6              | $\Delta$ <i>cnaA::argB1</i> $\Delta$ <i>cnaB::pyrG1 cnaA</i> <i>promo-cnaA-gfp-hph</i>                                            |
| ABKO-NPCNB-1                              | Af293.6              | $\Delta$ <i>cnaA::argB1</i> $\Delta$ <i>cnaB::pyrG1 cnaB</i> <i>promo-mcherry-cnaB-phleo</i>                                      |
| OCNAG3-LARFP                              | Af293.1              | $\Delta$ <i>cnaA::pyrG1 otef-cnaA-gfp-hph otef-LifeAct-RFP-phleo</i>                                                              |
| WT-LARFP                                  | Af293                | <i>otef-LifeAct-RFP-phleo</i>                                                                                                     |
| ABKO-LARFP                                | Af293.6              | $\Delta$ <i>cnaA::argB1</i> $\Delta$ <i>cnaB::pyrG1 otef-LifeAct-RFP-phleo</i>                                                    |
| ABKO-CNA-T359P-CNB-1                      | Af293.6              | $\Delta$ <i>cnaA::argB1</i> $\Delta$ <i>cnaB::pyrG1 cnaA</i> <i>promo-cnaA-T359P-gfp-hph cnaB</i> <i>promo-mcherry-cnaB-phleo</i> |
| ABKO-CNA-L365S-CNB-1                      | Af293.6              | $\Delta$ <i>cnaA::argB1</i> $\Delta$ <i>cnaB::pyrG1 cnaA</i> <i>promo-cnaA-L365S-gfp-hph cnaB</i> <i>promo-mcherry-cnaB-phleo</i> |
| BKO-OCNBG-tB3                             | Af293.1              | $\Delta$ <i>cnaB::pyrG1 otef-cnaB</i> <i>tB3-gfp-hph</i>                                                                          |
| BKO-OCNBG-SW2                             | Af293.1              | $\Delta$ <i>cnaB::pyrG1 otef-cnaB</i> <i>-SW2-gfp-hph</i>                                                                         |
| BKO-OCNBG-RG                              | Af293.1              | $\Delta$ <i>cnaB::pyrG1 otef-cnaB</i> <sup>mt</sup> <i>-RRRR-GGGG-gfp-hph</i>                                                     |
| BKO-OCNBG-RA                              | Af293.1              | $\Delta$ <i>cnaB::pyrG1 otef-cnaB</i> <sup>mt</sup> <i>-RLRKR-AAAAA-gfp-hph</i>                                                   |
| BKO-OCNBG-KA                              | Af293.1              | $\Delta$ <i>cnaB::pyrG1 otef-cnaB</i> <sup>mt</sup> <i>-KLDK-AAAA-gfp-hph</i>                                                     |
| OCNBG-tB1                                 | Af293                | <i>otef-cnaB-tB1-gfp-hph</i>                                                                                                      |
| OCNBG-tB2                                 | Af293                | <i>otef-cnaB-tB2-gfp-hph</i>                                                                                                      |
| OCNBG-tB3                                 | Af293                | <i>otef-cnaB-tB3-gfp-hph</i>                                                                                                      |
| OCNBG-tB4                                 | Af293                | <i>otef-cnaB-tB4-gfp-hph</i>                                                                                                      |
| OCNBG-tB5                                 | Af293                | <i>otef-cnaB-tB5-gfp-hph</i>                                                                                                      |
| OCNBG-tB6                                 | Af293                | <i>otef-cnaB-tB6-gfp-hph</i>                                                                                                      |
| OCNBG-tB7                                 | Af293                | <i>otef-cnaB-tB7-gfp-hph</i>                                                                                                      |
| OCNBG-tB8                                 | Af293                | <i>otef-cnaB-tB8-gfp-hph</i>                                                                                                      |
| BKO-NPCNB-1                               | Af293.1              | $\Delta$ <i>cnaB::pyrG1 cnaB</i> <i>promo-cnaB-gfp-hph</i>                                                                        |
| BKO-NPCNB-tB4                             | Af293.1              | $\Delta$ <i>cnaB::pyrG1 cnaB</i> <i>promo-cnaB</i> <i>tB4-gfp-hph</i>                                                             |
| BKO-NPCNB-tB5                             | Af293.1              | $\Delta$ <i>cnaB::pyrG1 cnaB</i> <i>promo-cnaB</i> <i>tB5-gfp-hph</i>                                                             |
| BKO-NPCNB-tB7                             | Af293.1              | $\Delta$ <i>cnaB::pyrG1 cnaB</i> <i>promo-cnaB</i> <i>tB7-gfp-hph</i>                                                             |
| BKO-NPCNB-tB8                             | Af293.1              | $\Delta$ <i>cnaB::pyrG1 cnaB</i> <i>promo-cnaB</i> <i>tB8-gfp-hph</i>                                                             |

**Supplementary Table S2: List of primers used in this study**

| <b>Name</b>                                                                                                                                                                                                                                                                                                                                                                           | <b>Sequence (5'-3')</b>                                                                                                                                                                                                                                                                               | <b>Direction</b>                                                                                                                  |
|---------------------------------------------------------------------------------------------------------------------------------------------------------------------------------------------------------------------------------------------------------------------------------------------------------------------------------------------------------------------------------------|-------------------------------------------------------------------------------------------------------------------------------------------------------------------------------------------------------------------------------------------------------------------------------------------------------|-----------------------------------------------------------------------------------------------------------------------------------|
| <p><b><u>Deletion of <i>cnaA</i></u></b><br/> <u>To clone into pLysB</u><br/>           5'cnaA LA ApaI<br/>           3'cnaA LA EcoRI<br/>           5'cnaA RA XbaI<br/>           3'cnaA RA NotI</p>                                                                                                                                                                                 | <p>TTTTGGGGCCCTTGATTGAACGGGTGCCG<br/>           TTTTGAATTTCGCGCAGTGTGAACTAAGG<br/>           TTTTCTAGAATTGCTTCGGTCACGTCC<br/>           TTTTGCGGCCGCGACGGGGTAGCGCACTGC</p>                                                                                                                            | <p>Forward<br/>           Reverse<br/>           Forward<br/>           Reverse</p>                                               |
| <p><b><u>Deletion of <i>cnaB</i></u></b><br/> <u>To clone into pJW24</u><br/>           cnaB KO OL1 SalI<br/>           cnaB KO OL2 EcoRI<br/>           cnaB KO RA NotI<br/>           cnaB KO RA SpeI</p>                                                                                                                                                                           | <p>TTGTCTGACTTACTGAGGACGGTTTCT<br/>           CCGAATTCTGGTTCGTGTGTGGTTGAG<br/>           TTTTGCGGCCGCGATCGCGACGCTTCT<br/>           TTTTACTAGTCAGGCCAAATCTAAGC</p>                                                                                                                                    | <p>Forward<br/>           Reverse<br/>           Forward<br/>           Reverse</p>                                               |
| <p><b><u>Complementation of <i>cnaA</i></u></b><br/> <u>To clone into pUCGH</u><br/>           GCNA-F2<br/>           GCNA-R-Bam</p>                                                                                                                                                                                                                                                  | <p>CGACGGATCCATGGATCAAGCACTGGCG<br/>           CGACGGATCCGGCTTCCCTAGTCTC</p>                                                                                                                                                                                                                          | <p>Forward<br/>           Reverse</p>                                                                                             |
| <p><b><u>Complementation of <i>cnaB</i></u></b><br/> <u>To clone into pUCNCR-phleo</u><br/>           CnB-F<br/>           CnB-R<br/> <u>To clone into pUCGH</u><br/>           CnaB-BamHI-F<br/>           CnB-Bam-R</p>                                                                                                                                                             | <p>TTGCGGCCGCGATGGAGCAGCCCAGTGAACC<br/>           TTGCGGCCGCGAACATACTCAGTGTTCATGC<br/>           CGACGGATCCATGGAGCAGCCCAGTGAACC<br/>           CGACGGATCCGAACATACTCAGTGTTCATGC</p>                                                                                                                    | <p>Forward<br/>           Reverse<br/>           Forward<br/>           Reverse</p>                                               |
| <p><b><u>Cloning of <i>CnaA</i> and <i>CnaB</i> promoters</u></b><br/> <u>To clone into pUCGH</u><br/>           CnaA-promo-KpnI-F<br/>           CnaA-promo-BamHI-R<br/> <u>To clone into pUCGH</u><br/>           CnaB-promo-KpnI-F<br/>           CnaB-promo-BamHI-R<br/> <u>To clone into pUCNCR-phleo</u><br/>           CnaB-promo-KpnI-F<br/>           CnaB-promo-BamHI-R</p> | <p>GTACGGTACCAAGTAGTCACCTGCGTGGACGTGG<br/>           CATAGGATCCCTTGCGCAGTGTGAACTAAGGAAT<br/>           GTACGGTACCCGTATCTAGTCATACGAACTTTGG<br/>           CATAGGATCCGTTGGTAAATGGTTCGTGTGTGGTT<br/>           GTACGGTACCCGTATCTAGTCATACGAACTTTGG<br/>           CATAGGATCCGTTGGTAAATGGTTCGTGTGTGGTT</p> | <p>Forward<br/>           Reverse<br/>           Forward<br/>           Reverse<br/>           Forward<br/>           Reverse</p> |
| <p><b><u>Mutations of <i>cnaA</i></u></b><br/> <u>T359P mutation</u><br/>           GCNAF2<br/>           CnaA-T359P-R2<br/>           CnaA-T359P-F2<br/>           GCNA-R-Bam</p>                                                                                                                                                                                                    | <p>CGACGGATCCATGGATCAAGCACTGGCG<br/>           GTACGGGTGAGGCGGGCAGTTGAAC<br/>           GTTCAACTGCCCCGCCTCACCCGTAC<br/>           CGACGGATCCGGCTTCCCTAGTCTC</p>                                                                                                                                       | <p>Forward<br/>           Reverse<br/>           Forward<br/>           Reverse</p>                                               |

|                                                          |                                                                     |                    |
|----------------------------------------------------------|---------------------------------------------------------------------|--------------------|
| <u>L365S mutation</u><br>GCNAF2<br>CnaA-L365S-R          | CGACGGATCCATGGATCAAGCACTGGCG<br>CCATGAAGTTTGGCGACCAGTACGG           | Forward<br>Reverse |
| CnaA-L365S-F<br>GCNA-R-Bam                               | CCGTAAGTGGTCGCCAAACTTCATGG<br>CGACGGATCCGGCTTCCCTAGTCTC             | Forward<br>Reverse |
| <b><u>Mutations of <i>cnaB</i></u></b>                   |                                                                     |                    |
| <u>RRRR to GGGG</u><br>CnaB-R-G-F<br>CnB-Bam-R           | ATGTATGATGCAGGCCGGGGTGGAGCATCTGTT<br>CGACGGATCCGAACATACTCAGTGTCATGC | Forward<br>Reverse |
| CnaB-BamHI-F<br>CnaB-R-G-R                               | CGACGGATCCATGGAGCAGCCCAGTGAACC<br>AACAGATGCTCCACCCCGCCTGCATCATACT   | Forward<br>Reverse |
| <u>RLRKR to AAAAA</u><br>CnaB-RLRKR-AAAAA-F<br>CnB-Bam-R | GAGGTGGACGCGGCCGCGGCCTTCATG<br>CGACGGATCCGAACATACTCAGTGTCATGC       | Forward<br>Reverse |
| CnaB-BamHI-F<br>CnaB-RLRKR-AAAAA-R                       | CGACGGATCCATGGAGCAGCCCAGTGAACC<br>CATGAAGGCCGCGGCCGCGTCCACCTC       | Forward<br>Reverse |
| <u>KLDK to AAAA</u><br>CnaB-KLDK-AAAA-F<br>CnB-Bam-R     | CGCTTCATGGCAGCTGCCGCGGATAGCTCC<br>CGACGGATCCGAACATACTCAGTGTCATGC    | Forward<br>Reverse |
| CnaB-BamHI-F<br>CnaB-KLDK-AAAA-R                         | CGACGGATCCATGGAGCAGCCCAGTGAACC<br>GGAGCTATCCGCGGCAGCTGCCATGAAGCG    | Forward<br>Reverse |
| <u>CnaB-SW2</u><br>cnaB-swap-2-F<br>CnB-Bam-R            | GAGATTCATGAACTTGACAA<br>CGACGGATCCGAACATACTCAGTGTCATGC              | Forward<br>Reverse |
| pUCGH-F<br>cnaB-swap-2-R                                 | GTGCCAGACTTTGTGTGTGC<br>GTCAAGTTTCATGAATCTCT                        | Forward<br>Reverse |
| <b><u>Truncations of <i>cnaB</i></u></b>                 |                                                                     |                    |
| <u>CnaB-tB1</u><br>CnB-SVGT-F<br>CnB-Bam-R               | TGCAACGGATCCTCTGTTGGGACATCACAGTTA<br>CGACGGATCCGAACATACTCAGTGTCATGC | Forward<br>Reverse |
| <u>CnaB-tB2</u><br>CnB-MKLDK-F<br>CnB-Bam-R              | CAACGGATCCATGAACTTGACAAGGATAGC<br>CGACGGATCCGAACATACTCAGTGTCATGC    | Forward<br>Reverse |
| <u>CnaB-tB3</u><br>CnaB-BamHI-F<br>CnB-EF1-3-R           | CGACGGATCCATGGAGCAGCCCAGTGAACC<br>CAACGGATCCCATGATCGTCTTATCCACGATC  | Forward<br>Reverse |
| <u>CnaB-tB4</u><br>CnB-MIAIF-F                           | CAACGGATCCATGATCACGATCTTC                                           | Forward            |

|                 |                                  |         |
|-----------------|----------------------------------|---------|
| CnB-Bam-R       | CGACGGATCCGAACATACTCAGTGTCATGC   | Reverse |
| <u>CnaB-tB5</u> |                                  |         |
| CnB-MIAIF-F     | CAACGGATCCATGATCACGATCTTC        | Forward |
| CnB-EF1-3-R     | CAACGGATCCCATGATCGTCTTATCCACGATC | Reverse |
| <u>CnaB-tB6</u> |                                  |         |
| CnaB-BamHI-F    | CGACGGATCCATGGAGCAGCCCAGTGAACC   | Forward |
| CnB-MKLDK-R     | CAACGGATCCCTTGTCAAGTTTCATGAAGCG  | Reverse |
| <u>CnaB-tB7</u> |                                  |         |
| CnaB-BamHI-F    | CGACGGATCCATGGAGCAGCCCAGTGAACC   | Forward |
| CnB-EF1-2-R     | CAACGGATCCCTTGGAGCTGAAAGCCGACAG  | Reverse |
| <u>CnaB-tB8</u> |                                  |         |
| CnB-EF3-4-F     | CAACGGATCCCTGTCCGGCTTTCAGCTCCAAG | Forward |
| CnB-Bam-R       | CGACGGATCCGAACATACTCAGTGTCATGC   | Reverse |
